# Supplementary material for: Effect of Surface Modification by Oxygen-Enriched Chemicals on the Surface Properties of Pine Bark Biochars
Source: MDPI journal article supplement (doi:10.3390/pr10102136), 2022-10-20
Supplement: s1 [file s1]

# Effect of surface modification by oxygen-enriched chemicals on the surface properties of pine bark biochars

Nitesh Kasera <sup>1,\*</sup>, Victoria Augoustides <sup>1</sup>, Praveen Kolar <sup>1,\*</sup>, Steven Hall <sup>1</sup>, and Billie Vicente <sup>2</sup>

<sup>1</sup> Department of Biological and Agricultural Engineering, North Carolina State University, 3100 Faucette Drive, Raleigh, NC 27695, USA

<sup>2</sup> Department of Biological Sciences, North Carolina State University, 112 Derieux Place, Raleigh, NC 27695-7614, USA

\* Correspondence: Nitesh Kasera: [nkasera@ncsu.edu](mailto:nkasera@ncsu.edu); Praveen Kolar: [pkolar@ncsu.edu](mailto:pkolar@ncsu.edu)

## Supplementary Information

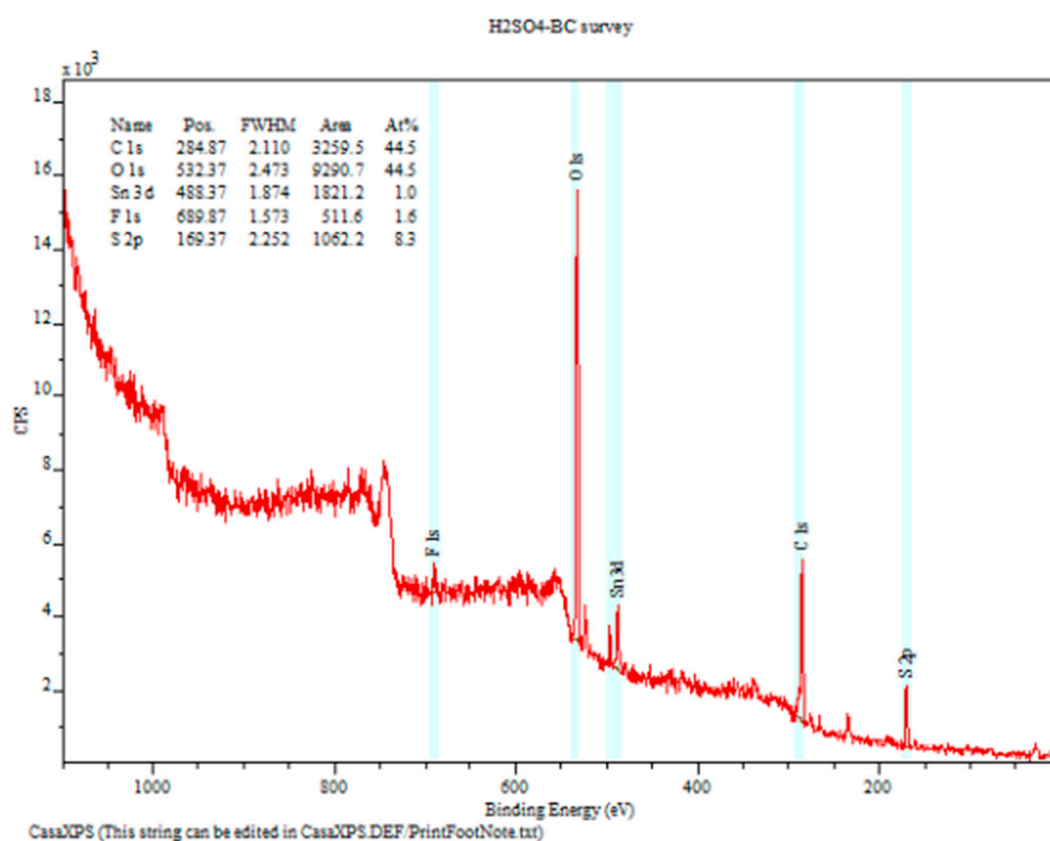

Figure S1: Raw XPS scan of H<sub>2</sub>SO<sub>4</sub>-BC

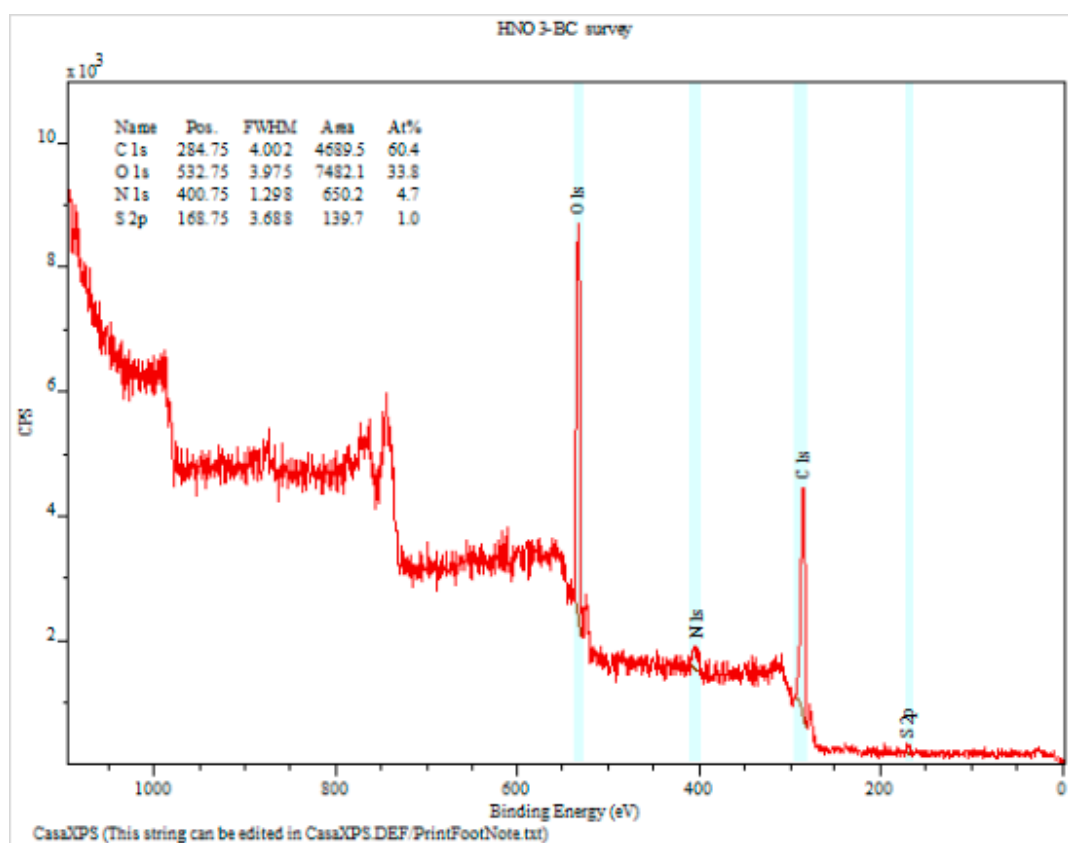

**Figure S2:** Raw XPS scan of HNO<sub>3</sub>-BC
